# Supplementary material for: Characterization of gut microbiota associated with clinical parameters in intrahepatic cholestasis of pregnancy
Source: Springer Nature journal article supplement (doi:10.1186/s12876-020-01510-w), 2020-11-23
Supplement: MOESM1 [file 18615502]

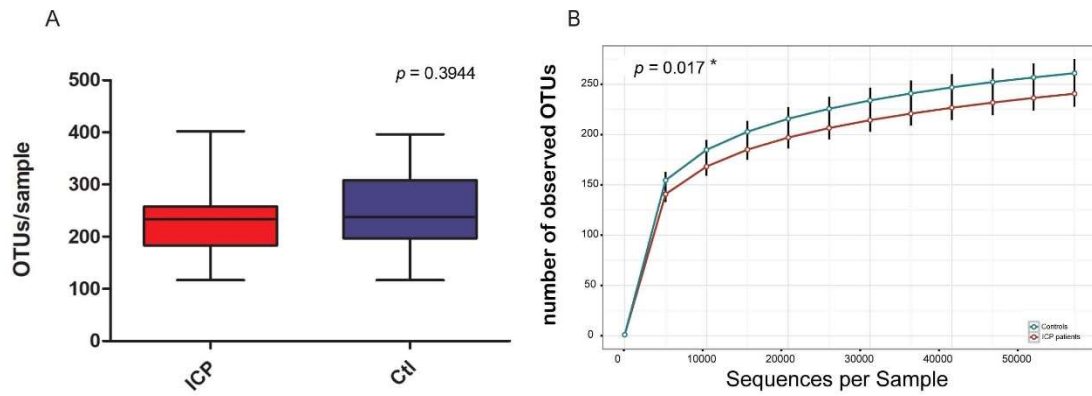

**Figure S1. Boxplot and rarefaction curves of operational taxonomic units (OTUs).** (A) Boxplot of OTUs of ICP patients and controls. The  $p$ -values are calculated by student's test. (B) The rarefaction curves of OTUs. The x-axis shows the number of valid sequences per sample and the y-axis shows the observed species (OTUs). The curve in red color represents ICP patients and the curve in green represents controls.

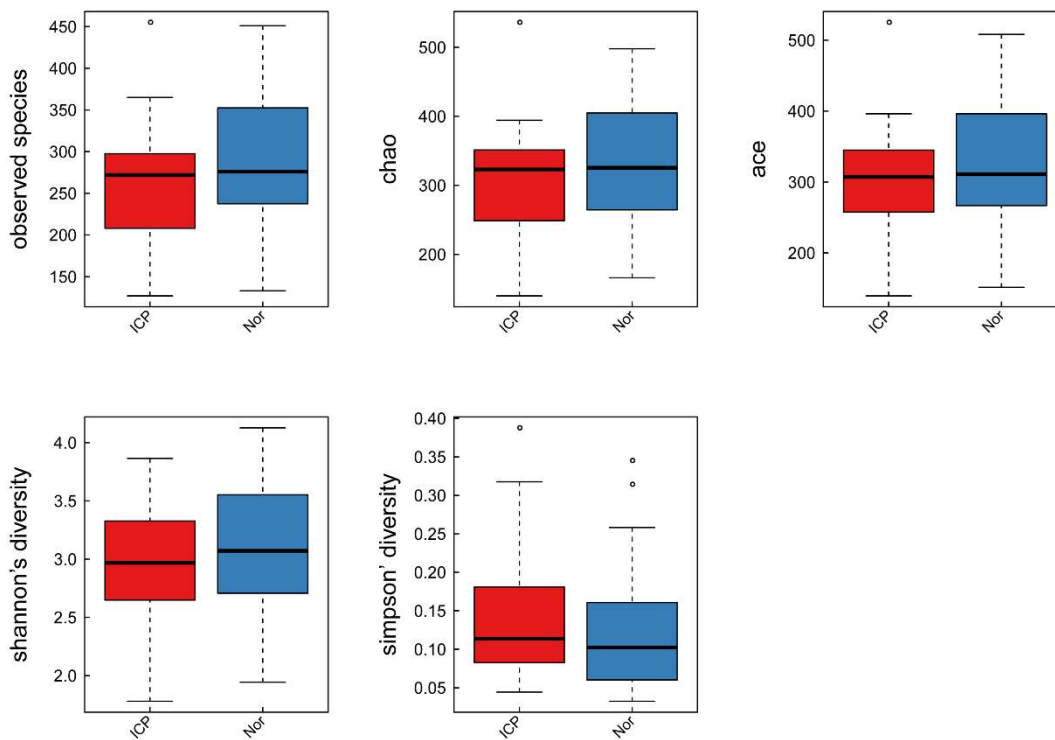

**Figure S2. Box-plots illustrating alpha diversity indices (Chao, ace, sobs, Shannon, simpson) in bacterial microbiota of ICP patients and controls.** Median values and interquartile ranges have been indicated in the plots.

**Table S1. The common core phylum-genus in ICP patients and controls.**

|                                                                                                                |
|----------------------------------------------------------------------------------------------------------------|
| <b>the common core phyla in both ICP and control groups</b>                                                    |
| k__Bacteria-p__Actinobacteria                                                                                  |
| k__Bacteria-p__Bacteroidetes                                                                                   |
| k__Bacteria-p__Firmicutes                                                                                      |
| k__Bacteria-p__Proteobacteria                                                                                  |
| <b>the common core genus in both ICP and control groups</b>                                                    |
| k__Bacteria-p__Actinobacteria-c__Actinobacteria-o__Bifidobacteriales-f__Bifidobacteriaceae-g__Bifidobacterium  |
| k__Bacteria-p__Bacteroidetes-c__Bacteroidia-o__Bacteroidales-f__Bacteroidaceae-g__Bacteroides                  |
| k__Bacteria-p__Bacteroidetes-c__Bacteroidia-o__Bacteroidales-f__Porphyromonadaceae-g__Parabacteroides          |
| k__Bacteria-p__Firmicutes-c__Bacilli-o__Bacillales-f__Bacillaceae-g__Bacillus                                  |
| k__Bacteria-p__Firmicutes-c__Bacilli-o__Lactobacillales-f__Streptococcaceae-g__Lactococcus                     |
| k__Bacteria-p__Firmicutes-c__Bacilli-o__Lactobacillales-f__Streptococcaceae-g__Streptococcus                   |
| k__Bacteria-p__Firmicutes-c__Clostridia-o__Clostridiales-f__-g__                                               |
| k__Bacteria-p__Firmicutes-c__Clostridia-o__Clostridiales-f__Clostridiaceae-g__Clostridium                      |
| k__Bacteria-p__Firmicutes-c__Clostridia-o__Clostridiales-f__Clostridiaceae-g__SMB53                            |
| k__Bacteria-p__Firmicutes-c__Clostridia-o__Clostridiales-f__Lachnospiraceae-Other                              |
| k__Bacteria-p__Firmicutes-c__Clostridia-o__Clostridiales-f__Lachnospiraceae-g__                                |
| k__Bacteria-p__Firmicutes-c__Clostridia-o__Clostridiales-f__Lachnospiraceae-g__Blautia                         |
| k__Bacteria-p__Firmicutes-c__Clostridia-o__Clostridiales-f__Lachnospiraceae-g__Coprococcus                     |
| k__Bacteria-p__Firmicutes-c__Clostridia-o__Clostridiales-f__Lachnospiraceae-g__Dorea                           |
| k__Bacteria-p__Firmicutes-c__Clostridia-o__Clostridiales-f__Lachnospiraceae-g__Lachnospira                     |
| k__Bacteria-p__Firmicutes-c__Clostridia-o__Clostridiales-f__Lachnospiraceae-g__Roseburia                       |
| k__Bacteria-p__Firmicutes-c__Clostridia-o__Clostridiales-f__Lachnospiraceae-g__[Ruminococcus]                  |
| k__Bacteria-p__Firmicutes-c__Clostridia-o__Clostridiales-f__Ruminococcaceae-g__                                |
| k__Bacteria-p__Firmicutes-c__Clostridia-o__Clostridiales-f__Ruminococcaceae-g__Butyricoccus                    |
| k__Bacteria-p__Firmicutes-c__Clostridia-o__Clostridiales-f__Ruminococcaceae-g__Faecalibacterium                |
| k__Bacteria-p__Firmicutes-c__Clostridia-o__Clostridiales-f__Ruminococcaceae-g__Oscillospira                    |
| k__Bacteria-p__Firmicutes-c__Clostridia-o__Clostridiales-f__Ruminococcaceae-g__Ruminococcus                    |
| k__Bacteria-p__Firmicutes-c__Clostridia-o__Clostridiales-f__Veillonellaceae-g__Phascolarctobacterium           |
| k__Bacteria-p__Firmicutes-c__Erysipelotrichi-o__Erysipelotrichales-f__Erysipelotrichaceae-g__                  |
| k__Bacteria-p__Proteobacteria-c__Betaproteobacteria-o__Burkholderiales-f__Alcaligenaceae-g__Sutterella         |
| k__Bacteria-p__Proteobacteria-c__Deltaproteobacteria-o__Desulfovibrionales-f__Desulfovibrionaceae-g__Bilophila |
| k__Bacteria-p__Proteobacteria-c__Gammaproteobacteria-o__Enterobacteriales-f__Enterobacteriaceae-g__Escherichia |

**Table S2. alpha diversity index value.**

| #Alpha  | mean (ICP) | SD (ICP) | mean (Nor) | SD (Nor) | <i>p</i> -value |
|---------|------------|----------|------------|----------|-----------------|
| sobs    | 264.7778   | 71.1825  | 286.129    | 82.96776 | 0.38265         |
| chao    | 309.2285   | 80.28008 | 327.8503   | 90.37645 | 0.44788         |
| ace     | 307.6283   | 76.81137 | 322.2008   | 89.97471 | 0.50554         |
| shannon | 2.9594     | 0.54626  | 3.1374     | 0.57948  | 0.37705         |
| simpson | 0.14116    | 0.08397  | 0.12164    | 0.07887  | 0.2573          |

The mean and standard deviations of alpha diversity indices (Chao, ace, sobs, Shannon, simpson).
